# Supplementary material for: Evolution of Outbreak-Causing Carbapenem-Resistant Klebsiella pneumoniae ST258 at a Tertiary Care Hospital over 8 Years
Source: PubMed Central journal article supplement (PMC6722418; doi:10.1128/mbio.01945-19), 2019-09-03
Supplement: mBio.01945-19-sf004.pdf [file mBio.01945-19-sf004.pdf]

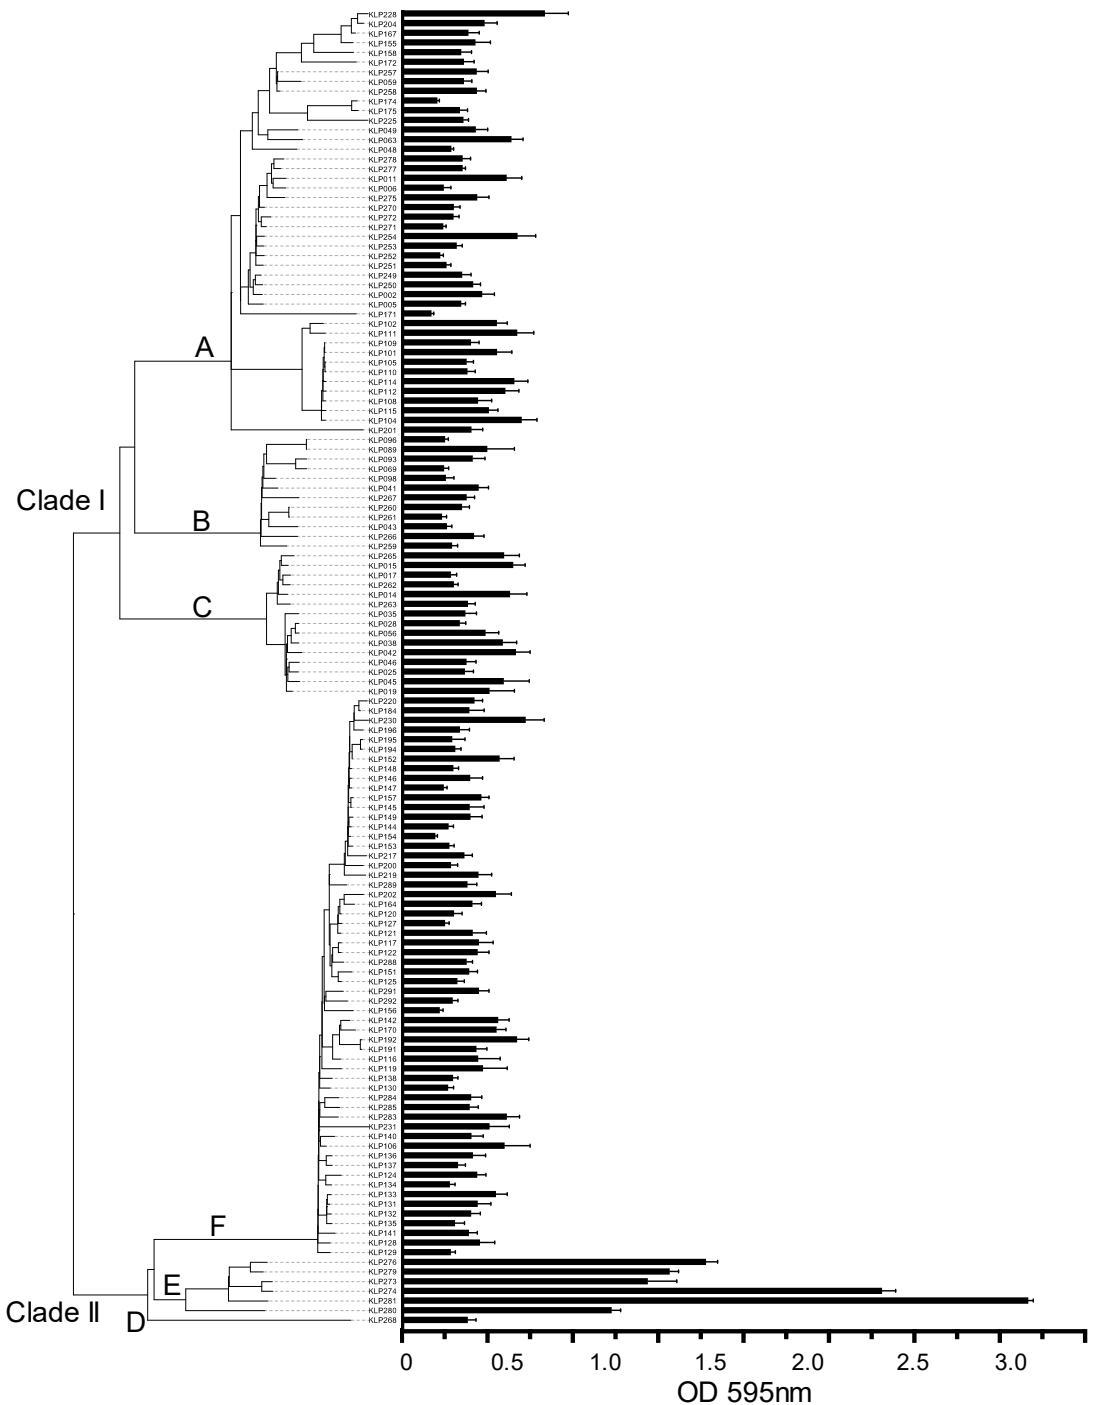

Fig. S4A

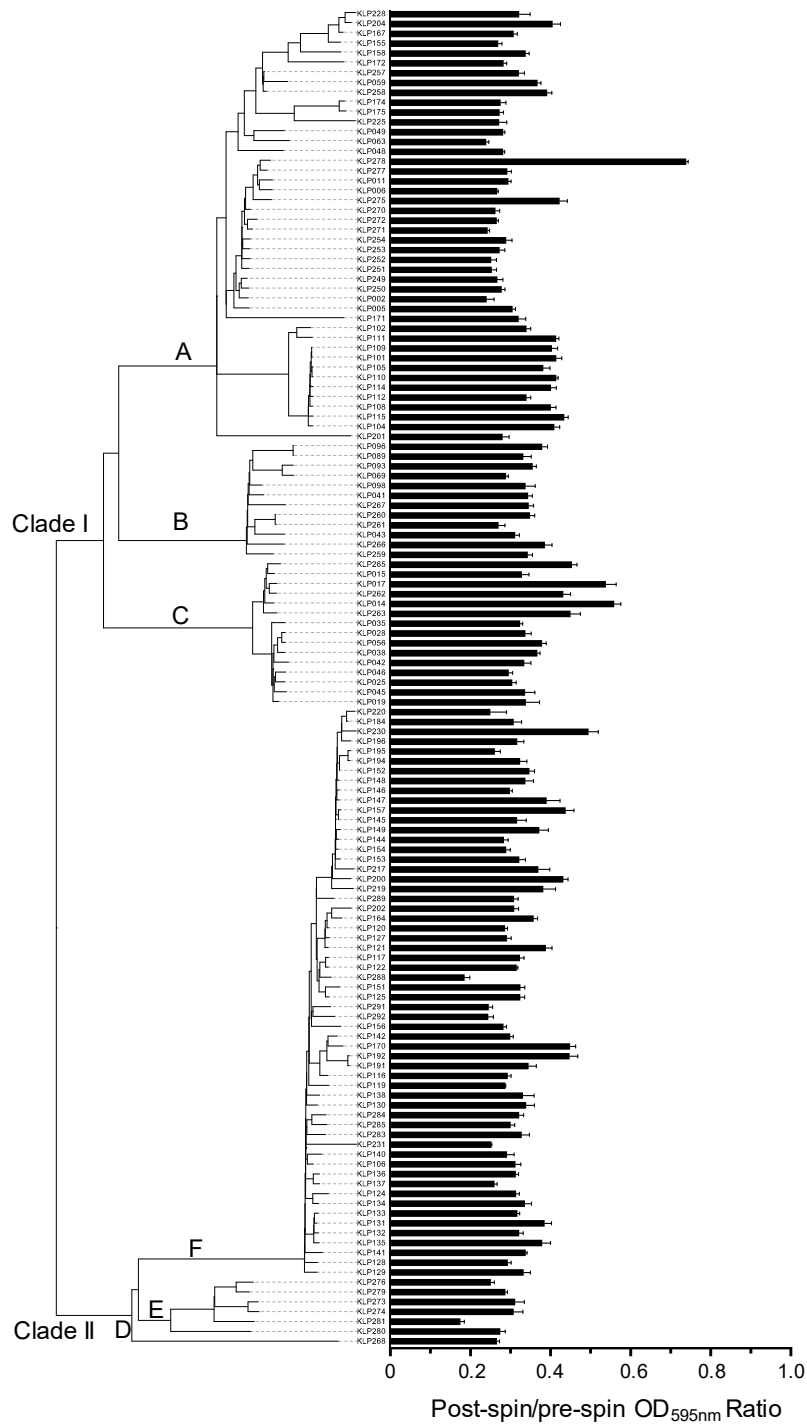

**Fig. S4B**
